# Supplementary material for: Comparative Phosphoproteomics Reveals an Important Role of MKK2 in Banana (Musa spp.) Cold Signal Network
Source: PubMed Central journal article supplement (PMC5247763; doi:10.1038/srep40852), 2017-01-20
Supplement: srep40852-s1.pdf [file srep40852-s1.pdf]

# Comparative Phosphoproteomics Reveals an Important Role of MKK2 in Banana (*Musa spp.*) Cold Signal Network

Jie Gao<sup>1,2,3,4,\*</sup>, Sheng Zhang<sup>6,\*</sup>, Wei-Di He<sup>2,3,4,5</sup>, Xiu-Hong Shao<sup>2,3,4</sup>,  
Chun-Yu Li<sup>2,3,4</sup>, Yue-Rong Wei<sup>2,3,4</sup>, Gui-Ming Deng<sup>2,3,4</sup>, Rui-Bin  
Kuang<sup>2,3,4</sup>, Chun-Hua Hu<sup>2,3,4</sup>, Gan-Jun Yi<sup>2,3,4</sup> and Qiao-Song Yang<sup>2,3,4</sup>

# Supplemental Figure S1a

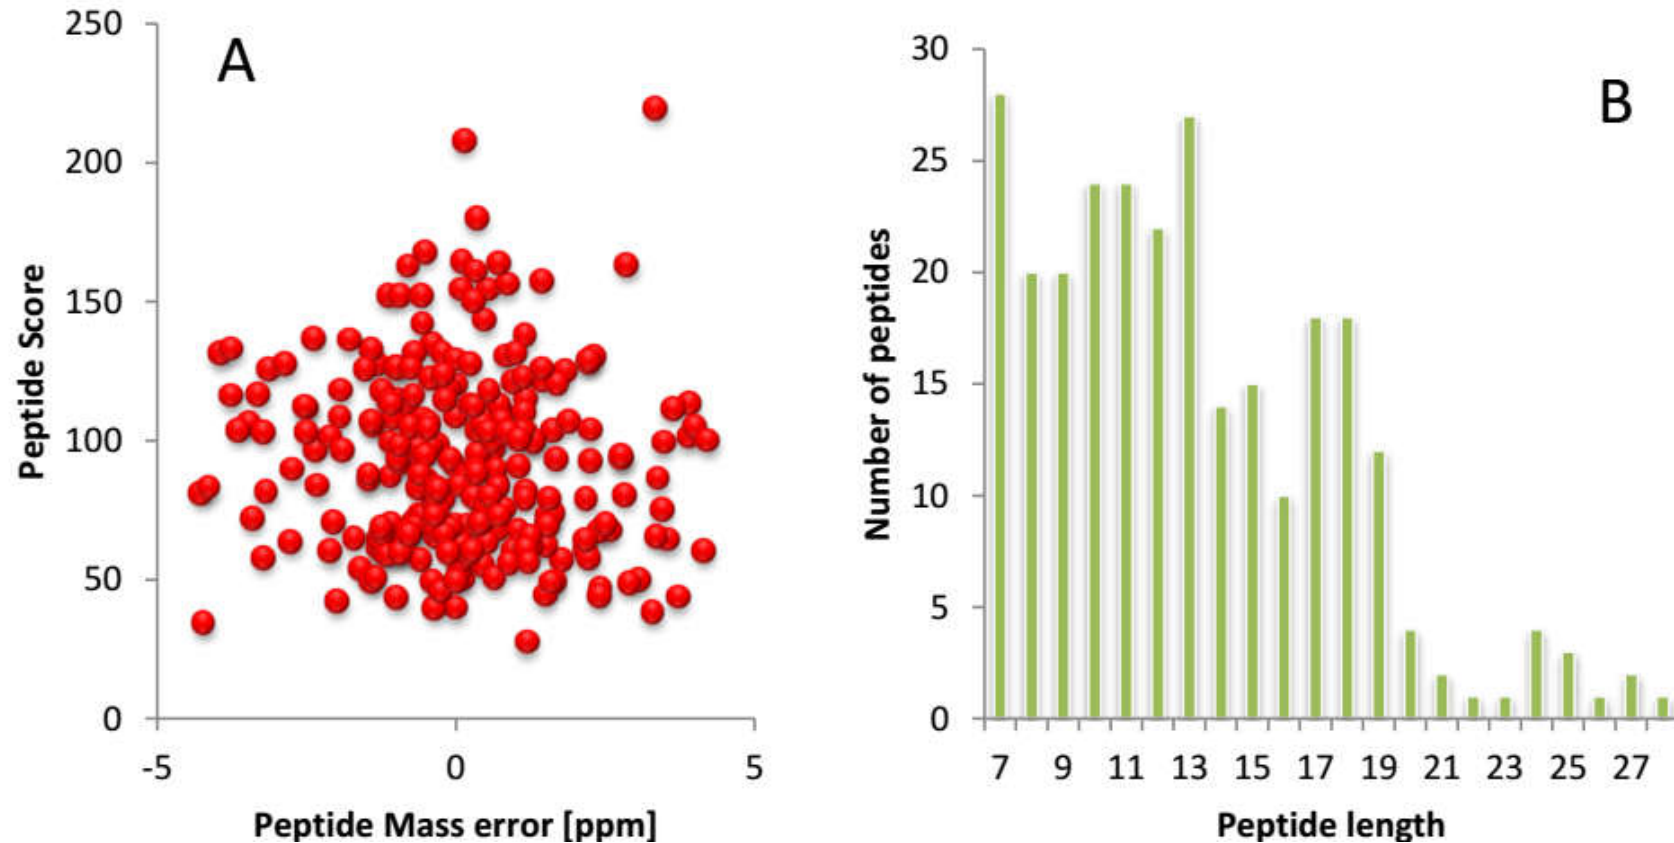

Supplemental Figure S1a. QC validation of Dajiao MS data. (A) Mass error and peptide score distribution of all identified peptides. (B) Peptide length distribution.

## Supplemental Figure S1b

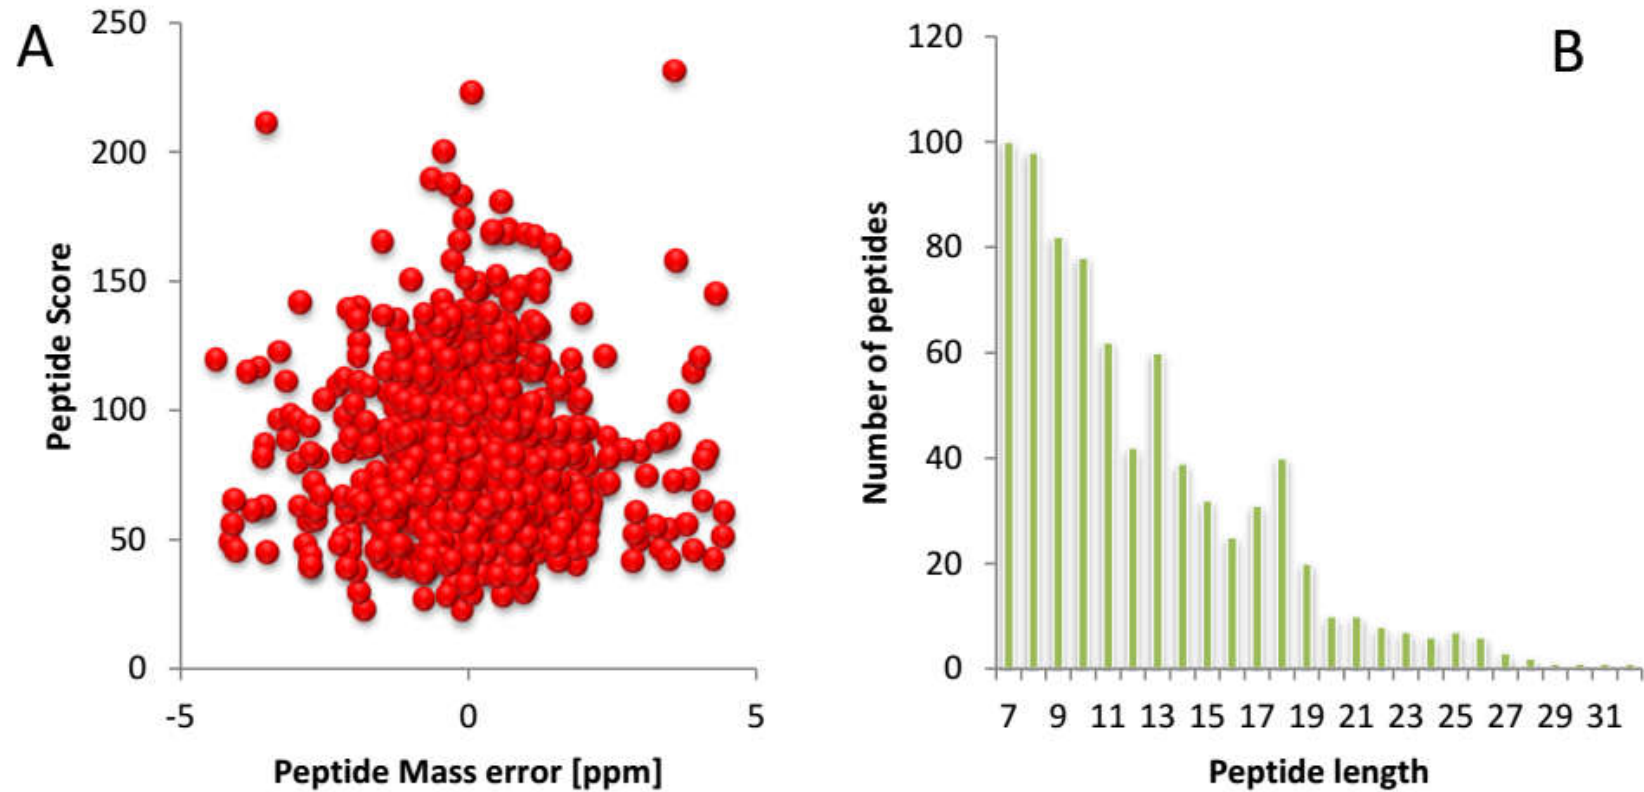

Supplemental Figure S1b. QC validation of Banana Cavendish MS data. (A) Mass error and peptide score distribution of all identified peptides. (B) Peptide length distribution.

# Supplemental Figure S2A

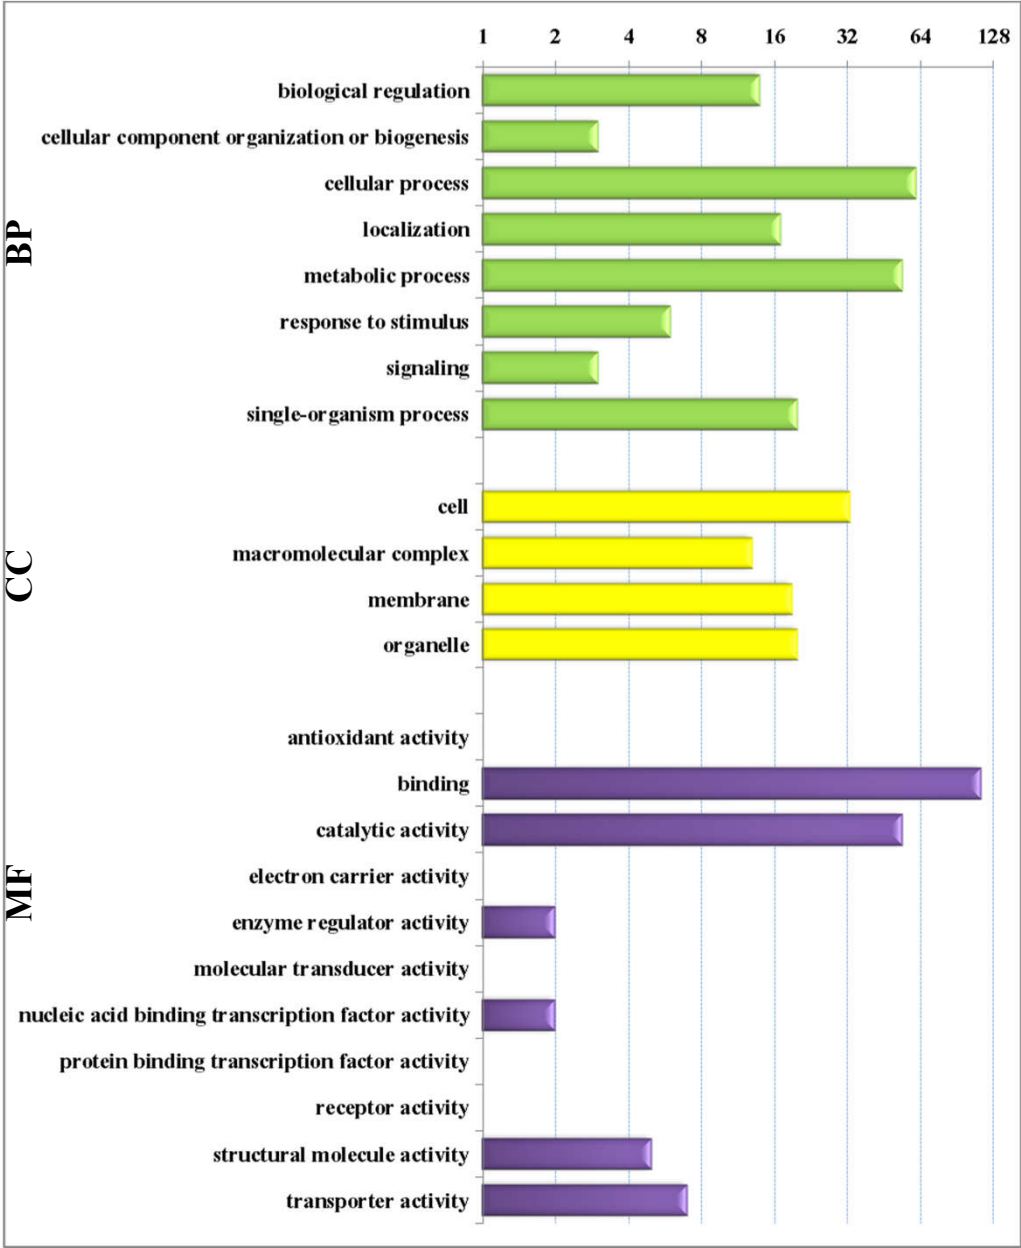

Supplementary Figure S2A. Distribution of phosphoprotein Gene Ontology functional classifications in Dajiao.

# Supplemental Figure S2B

Supplementary Figure Distribution of phosphoprotein Gene Ontology functional classifications in Cavendish Banana. BP: biological process, CC: Cellular component, MF: molecular function.

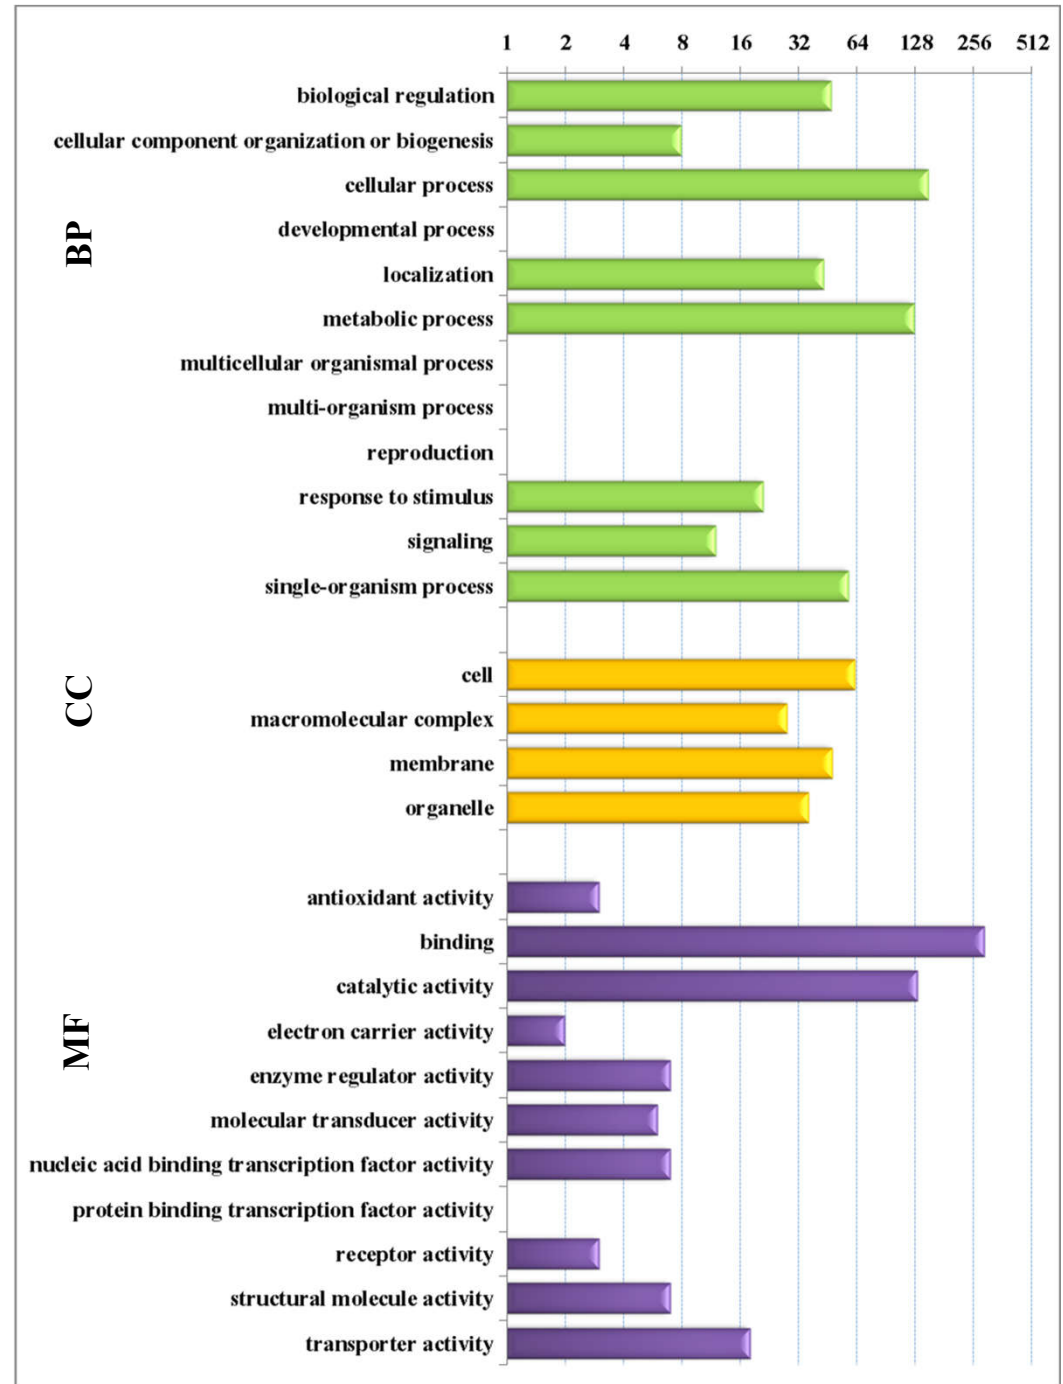

# Supplemental Figure S3A

Supplementary Figure S3A. Comparison of  $\log_2$  TMT ratio for phosphosites identified in three biological replicates of Dajiao. The largest internal errors were 0.44, corresponding to a 1.35-fold change, which was used as a threshold of significant changes in response to cold stress.

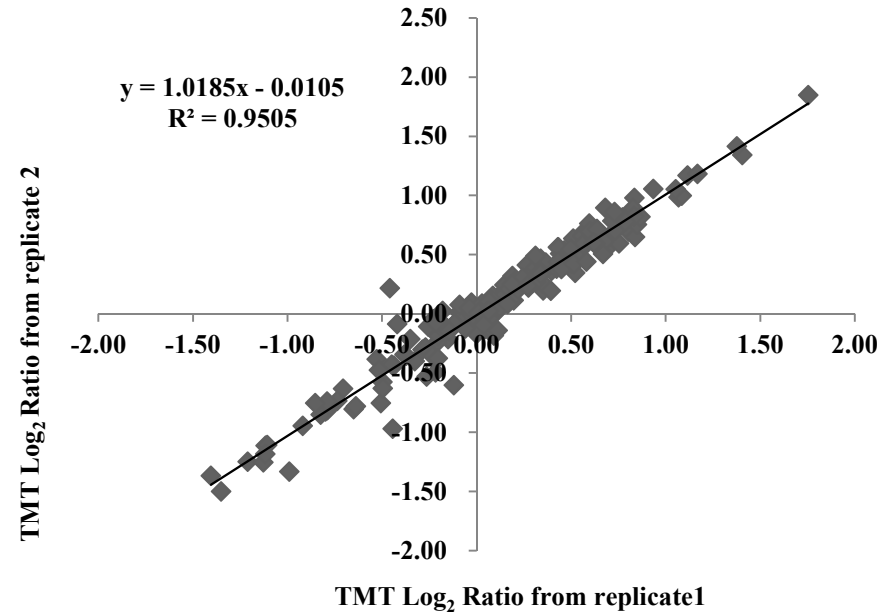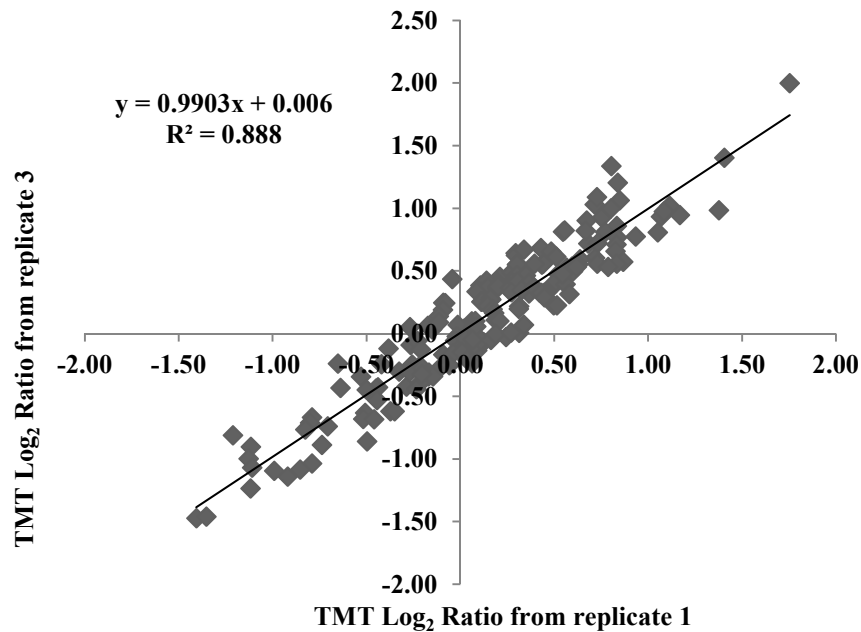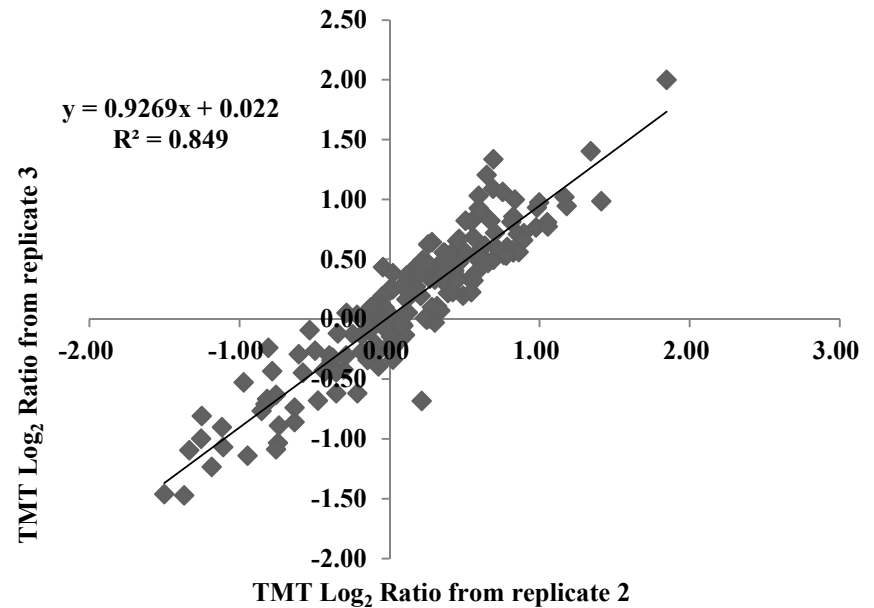

# Supplemental Figure S3B

Supplementary Figure S3B. Comparison of log<sub>2</sub> TMT ratio for phosphosites identified in three biological replicates of Cavendish Banana. The largest internal errors were 0.42, corresponding to a 1.34-fold change, which was used as a threshold of significant changes in response to cold stress.

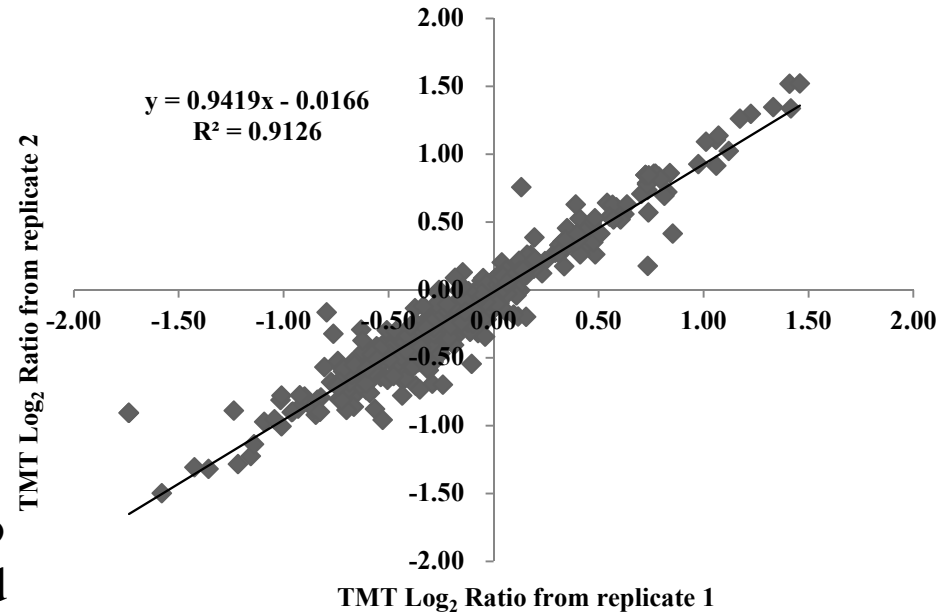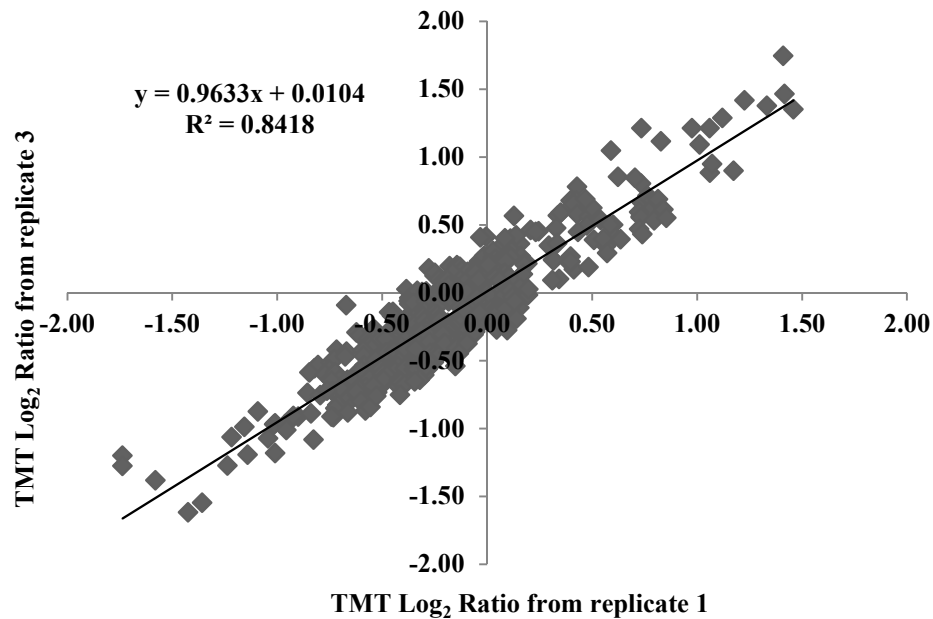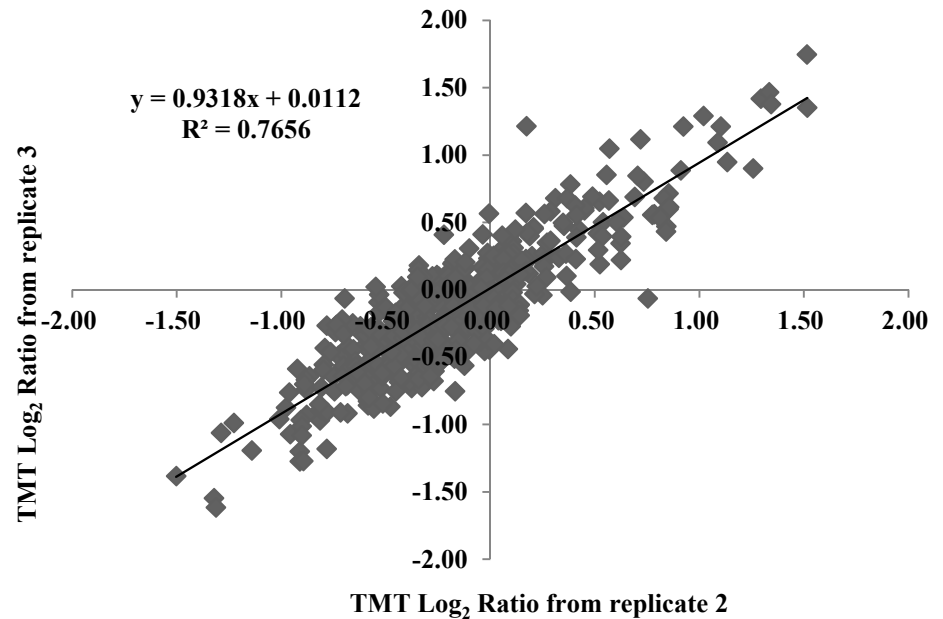

# Supplemental Figure S4

A

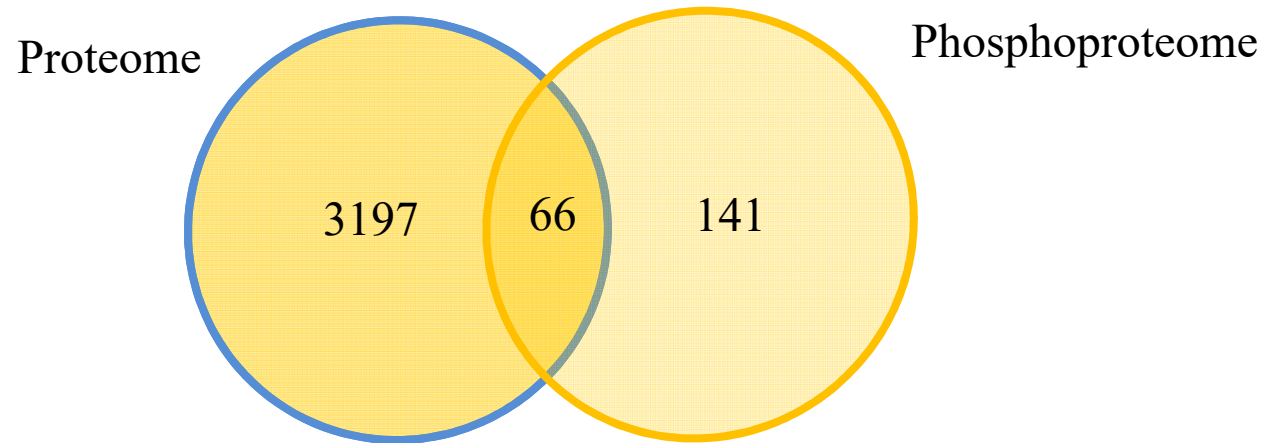

B

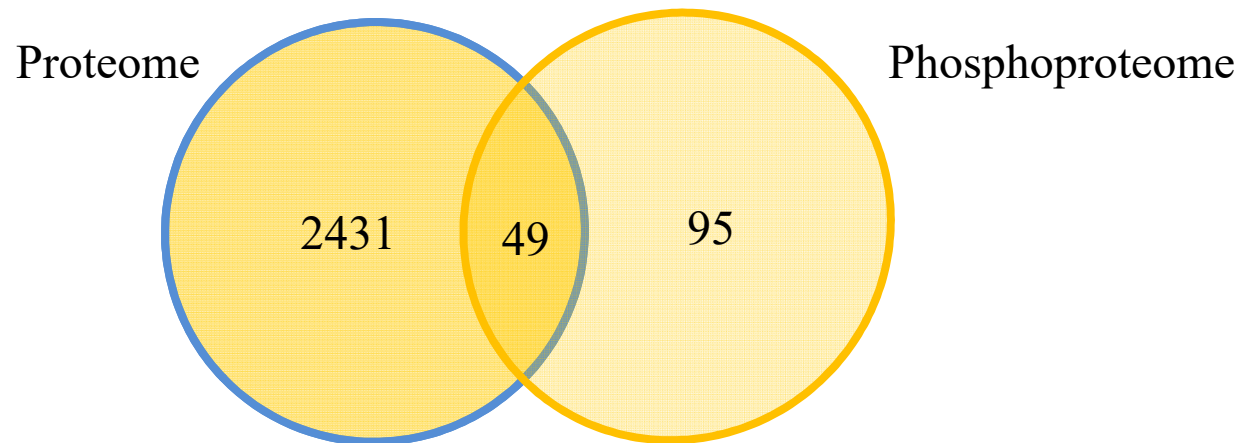

Supplementary Figure S4. Venn diagrams of number of proteins identified in Daojiao phosphoproteome and proteome. (A) The number of identified proteins; (B) The number of quantified proteins.



# Supplemental Figure S5

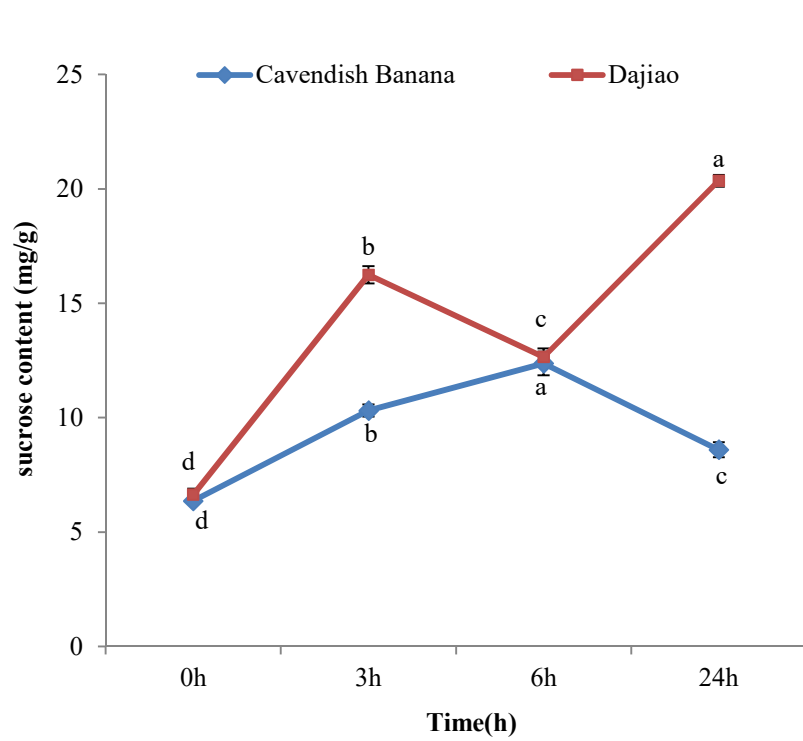

(A)

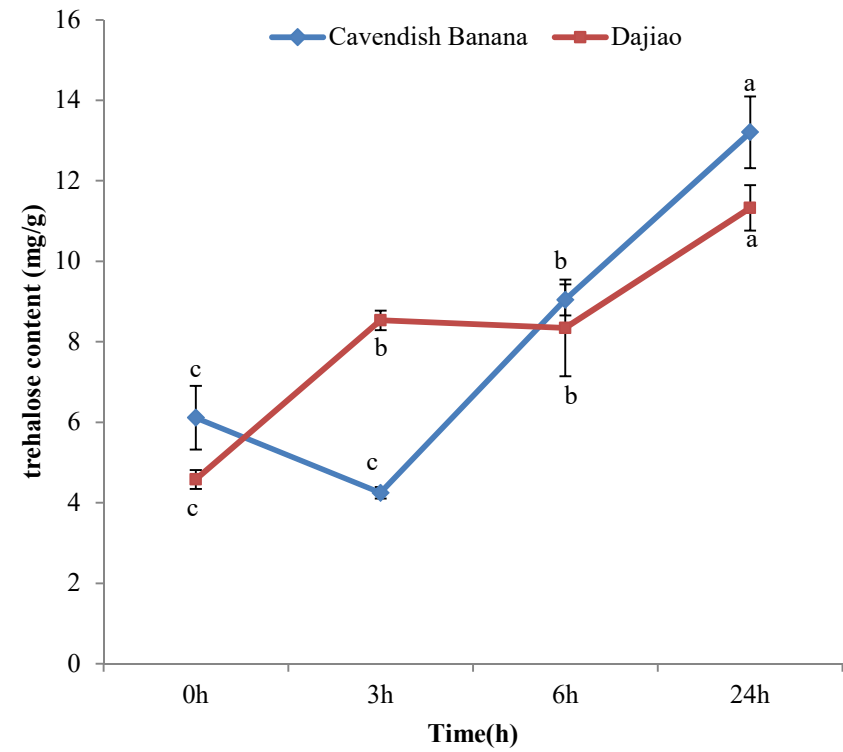

(B)

Supplementary Figure S5. (A) Sucrose content in Cavendish Banana and Dajiao under cold stress. (B) Trehalose content in Cavendish Banana and Dajiao under cold stress.

**Table S2. Comparison of conserved phosphosites in Cavendish Banana, Dajiao with common plant species in UniprotKB database**

| Species                        | Phosphorylation [STY] |            |                   | Un-phosphorylation [STY] |            |                   | Fisher' exct test P value |
|--------------------------------|-----------------------|------------|-------------------|--------------------------|------------|-------------------|---------------------------|
|                                | Conserved             | unconseved | Conserved percent | Conserved                | unconseved | Conserved percent |                           |
| <i>Vitis vinifera</i>          | 157                   | 601        | 20.71%            | 7347                     | 33224      | 18.11%            | 0.01994                   |
| <i>Oryza sativa</i>            | 140                   | 618        | 18.47%            | 6393                     | 34178      | 15.76%            | 0.01343                   |
| <i>Arabidopsis thaliana</i>    | 165                   | 593        | 21.77%            | 8403                     | 32168      | 20.71%            | 0.17187                   |
| <i>Glycine max</i>             | 154                   | 604        | 20.32%            | 6507                     | 34064      | 16.04%            | 0.00043                   |
| <i>Sorghum bicolor</i>         | 165                   | 593        | 21.77%            | 8088                     | 32483      | 19.94%            | 0.06905                   |
| <i>Solanum lycopersicum</i>    | 170                   | 588        | 22.43%            | 7666                     | 32905      | 18.90%            | 0.00379                   |
| <i>Brachypodium distachyon</i> | 168                   | 590        | 22.16%            | 8333                     | 32238      | 20.54%            | 0.09116                   |
| <i>Zea mays</i>                | 123                   | 635        | 16.23%            | 5787                     | 34784      | 14.26%            | 0.04398                   |
| <b>Average result</b>          |                       |            | <b>20.48%</b>     |                          |            | <b>18.03%</b>     |                           |

**Table S4. The information of 6 MEKK1 proteins, 2 MAPK4 proteins and 1 MAPK6**

| Protein accession      | Protein names                                             |
|------------------------|-----------------------------------------------------------|
| GSMUA_Achr10P02140_001 | Putative Mitogen-activated protein kinase kinase kinase 1 |
| GSMUA_Achr10P25540_001 | Mitogen-activated protein kinase kinase kinase 1          |
| GSMUA_Achr11P13500_001 | Mitogen-activated protein kinase kinase kinase 1          |
| GSMUA_Achr1P12210_001  | Putative Mitogen-activated protein kinase kinase kinase 1 |
| GSMUA_Achr2P07690_001  | Mitogen-activated protein kinase kinase kinase 1          |
| GSMUA_Achr7P11850_001  | Putative Mitogen-activated protein kinase kinase kinase 1 |
| GSMUA_Achr4P03760_001  | Mitogen-activated protein kinase 4                        |
| GSMUA_Achr4P11270_001  | Mitogen-activated protein kinase 4                        |
| GSMUA_Achr11P02860_001 | Mitogen-activated protein kinase 6                        |
